# Supplementary material
Source: PubMed Central journal article supplement (PMC5728652)

## SUPPLEMENTAL MATERIAL

**ALLHAT Collaborate Research Group:** Members of the ALLHAT Group: Steering Committee: Furberg, Wright, Davis, Cutler, Alderman, Black, Cushman, Grimm, Haywood, Leenen, Oparil, Probstfield, Whelton; NHLBI Project Office: Cutler, Nwachuku, Gordon, Proschan, Einhorn; ALLHAT Clinical Trials Center: Davis, Ford, Piller, Dunn, Pressel, Bettencourt, deLeon, Simpson, Blanton; ALLHAT Regions: Veterans Administration, Memphis, Tenn: Cushman, Geraci, Walsh, Nelson; Cleveland, Ohio: Wright, Rahman, Juratovac, Pospisil, Suhan; Bronx, NY: Alderman, Carroll, Russo, Sullivan; Chicago, Ill: Black, Barone, Christian, Feldman, Lucente; Birmingham, Ala: Oparil, Calhoun, Jenkins, McDowell; Seattle, Wash: Probstfield; Alzate, Johnson, Kingry; Minneapolis, Minn: Grimm, Margolis, Holland, Jaeger; New Orleans, La (formerly located in Baltimore, Md): Whelton, Williamson, Louis, Ragusa, Williard, Adler; Ottawa, Ontario, Canada: Leenen, Ferguson, Tanner; ALLHAT Central Laboratory: J. Eckfeldt, J. Bucksa, M. Nowicki; ALLHAT Drug Distribution Center: J. Pelosi; ALLHAT Electrocardiogram Reading Center: R. Crow, S. Thomas; ALLHAT Data and Safety Monitoring Board: R. Califf, W. Applegate, J. Buring, E. Cooper, K. Ferdinand, M. Fisher, R. Gifford, S. Sheps. Investigators and Coordinators Participating in the Antihypertensive and Lipid Trials, United States: Alabama: L. Ada, D. Alexander, L. Black, C. Davis, W. Davis, S. Farooqui, H. Fritz, T. Kessler, S. Ledbetter, L. Means, J. Patterson, N. Qureshi, L. Redcross, R. Reeves, T. Tucker, N. Wettermark, A. Williams, W. Yarbrough; Arizona: I. Cohen, W. Dachman, N. Estrada, J. Felicetta, D. Fowler, R. Fowler, S. Goldman, C. Lui, S. Morris, D. Morrison, J. Nelson, J. Ohm, D. Paull, G. Pulliam, D. Roberts, I. Ruiz, H. Thai; Arkansas: J. Acklin, M. Azhar, F. Berry, D. Burns, W. Carter, M. Dixon, S. Eldridge, A. Fendley, H. Fendley, M. Flowers, S. Goss, M. Guyer, G. Harris, M. Hawkins, D. Hopson, P. Kern, R. King, M. Lynch, E. Maples, R. McCafferty, M. McGehee, J. Miller, D. Neil, M. Oakum, N. Paslidis, K. Riordan, G. Robbins, D. Simmons, C. Vilayvanh, S. Whitmer; California: C. Alvarez, D. Anderson, M. Ariani, S. Barrett, J. Boggess, B. Brackeen, A. Bui, P. Callaham, M. Calong, J. Camacho, J. Cavendish, G. Chao, D. Cheung, B. Christianson, W. Dempsey, G. Dennish, V. DeQuattro, R. Dharawat, D. Dizmang, N. Doherty, M. Donnell, S. Edmondson, D. Falcone, S. Franklin, J. Frazee, G. Frivold, S. Ghattas, D. Goldfarb Waysman, T. Haskett, L. Haywood, N. Horton, Y. Huang, K. Hui, N. Jacob, K. Jolley, B. Jurado, A. Karns, R. Karns, K. Karunaratne, A. Katchem, L. Katchem, J. Khoo, E. Kiger, L. Kleinman, J. Kozlowski, D. Kramer, E. Lee, D. Li, C. Libanati, P. Linz, D. Lyle, T. Maekawa, M. Mahig, J. Mallery, D. Martins, B. Massie, R. Mikelionis, S. Myers, J. Neutel, N. Nguyen, U. Okoronkwo, K. Owens, T. Pan, R. Petersen, A. Schultz, H. Schultz, E. Schwartz, J. Schwartz, P. Schwartz, C. Scott, Z. Song, J. Taylor, D. Townsend, S. Turitzin, D. Ujiye, A. Usman, D. Van Ostaeyen, R. Wadlington, C. Wan, L. Wang, H. Ward, L. Wieland, P. Williams-Brown, N. Wong, R. Wright; Colorado: K. Castleman, M. Chase, R. Hildenbrand, P. Lowe, P. Mehler, S. Mroz, R. Simpson, R. Tello; Connecticut: J. Bernene, L. Ciarcia, A. Grover, J. Judge, A. Lachman, J. Lawson, N. Medina, E. Nestler, R. Schwartz, B. Sicignano, S. Solinsky; Washington, DC: J. Golden, E. Lewis, D. Mateski, P. Narayan, A. Notargiacomo, D. Ordor, V. Papademetriou, O. Randall, T. Retta, J. Theobalds, S. Xu; Delaware: D. Crane, J.

Lenhard; Florida: K. Anderson, S. Beery, G. Bhaskar, B. Booker, K. Broderick, E. Capili-Rosenkranz, J. Ciocon, G. Cohn, T. Connelly, V. Dallas, G. Duren, J. Durr, J. Evans, S. Feld, R. Feldman, L. Fischer, S. Fisher, M. Formoso, S. Fulford, M. Galler, J. Hildner, K. Holman, A. Jackson, C. Jackson, G. Khan, M. Khan, S. Kronen, J. Lehmann, A. Littles, R. Lopez, N. Madhany, L. McCarty, K. Mullinax, M. Murray, J. Navas, A. Peguero Rivera, R. Preston, N. Rolbiecki, J. Rolle, L. Rosenfield, O. Saavedra, A. Schlau, M. Stein, J. Stokes, S. Strickland, U. Tran, B. Videau, J. Webster, T. Webster, A. Weinstein, T. Westfall, D. Williams, M. Yoham; Georgia: D. Anderson, R. Anderson, J. Barzilay, S. Boyce, P. Brackett, P. Bradley, W. Brown, R. Carter, S. Carter, D. Castro, L. Duty, H. Ellison, A. Francis, L. Goodman, D. Harrelson, T. Hartney, J. Heldreth, J. Heneisen, A. Hicks, L. Hornsby, J. Hudson, S. Hurst, L. Iskhakova; S. James, S. James, Y. Jones, K. Kersey, W. Kitchens, N. London, M. Loraditch, G. Lowe, R. Maddox, R. Malcolm, D. Mathis, C. Mayers, M. McDaniel, N. McPhail, A. Mikhail, H. Muecke, R. Noel, W. North, N. Parikh, D. Parish, G. Peters, P. Poulos, M. Ram, W. Rawlings, R. Remler, C. Rice, M. Salles, D. Sauers, A. Scheetz, C. Scott, L. Stevenson, J. Sumner, M. Sweeney, E. Taylor, K. Upadhy, T. Vu, M. Walsh, K. Williams, H. Yager; Illinois: M. Arron, C. Bareis, J. Barnett, G. Barone, C. Bermele, T. Bertucci, J. Cheng, J. Cruz, T. Denecke-Dattalo, S. Durfee, E. Edwards, L. Fahrner, D. Farley, T. Flegel, M. Friedman, C. Gaca, J. Gilden, S. Goldman, J. Graumlich, A. Hoffman, K. Hunt, C. Johnson, P. Kellums, A. Lasala, N. Lasala, V. Lauderdale, M. Lesko, F. Lopez, M. Mansuri, S. Mansuri, M. Martin, L. Moody, L. Morowczynski, S. Mouritzen, N. Novotny, A. Ovalle, P. Pedersen, N. Perlman, P. Porcelli, B. Ragona, R. Sadiq, P. Sands, C. Simmons, K. Stevens, G. Sussman, D. Vicencio, A. Villafria, R. Villafria, R. Watkins; Indiana: J. Addo, J. Beliles, V. Dave, D. Fausset, J. Fox, D. Fryman, J. Hall, J. Koehler, L. Leavy, P. Linden, E. Long, H. Macabalitaw, T. Nguyen, B. Peterson, J. Pratt, D. Rosanwo, D. Ross, H. Shah, V. Shah, T. Smith, M. Sobol, B. Viellieu-Fischer, J. Wachs, B. Weinberg; Iowa: V. Butler, A. Durbin, R. Glynn, B. Hargens, W. Lawton, M. Roberts, J. Roepke, R. Schneider, G. Stanley; Idaho: M. Baker, R. Force, T. Gillespie, S. Hillman, K. Krell, M. Macdonald; Kansas: D. Courtney, B. Crawford, D. DeVore, J. Moppin, N. Prem Singh, K. Reuben-Hallock, R. Schanker, D. Wilson; Kentucky: R. Berkley, M. DeMuro, L. Kazmierzak, A. Rayner, C. Tyler, E. Wells, S. Winters; Louisiana: E. Aguilar, L. Bass, V. Batuman, B. Beard, L. Borrouso, M. Campbell, C. Chubb, P. Connor, C. Conravey, D. Doucet, M. Doucet, J. Dunnick, D. Eldridge, T. Eldridge, P. Galvan, A. Gupta, J. Hollman, D. Hull, B. Jackson, T. Jones, A. Klenk, P. Lakshmiprasad, B. Mahl, J. Paraniham, E. Reisin, H. Rothschild, J. Sampson, B. Samuels, J. Schmitt, A. Smith, V. Valentino, C. Verrett, P. Willhoit; Maine: B. Blake, T. Lebrun, C. Walworth, R. Weiss; Maryland: J. Burton, W. Carr, P. Chance, S. Childs, C. Compton, J. Cook, V. Coombs, J. Daniels, P. Death, L. Essandoh, Y. Ferguson, D. Fraley, M. Freedman, M. Gary, F. Gloth, S. Gottlieb, M. Gregory, S. Hairston, P. Hall, B. Hamilton, J. Hamilton, D. Harrison, D. James, B. Kerzner, A. Lancaster, H. Lutz, J. Marks, J. Martin, J. Mersey, L. Nelson, E. Obah, S. Ong, J. Palacios, S. Park, M. Partlow, M. Posner, H. Rachocka, M. Rubin, M. Rubinstein, M. Rykiel, C. Smith, B. Socha, K. Thompson, K. Walker, J. Webber, K. Williams; Massachusetts: L. Bradshaw, A. Chakraborty, F. DiMario, J. Ingelfinger, J. Pincus, A. Sobrado; Michigan: L. Bey-Knight, D. Carson, A. Cavanaugh, M. Chertok, K. Church, H. Colfer, I. Diaz, B. Dobbs, G. Edelson, J. Fabello-Gamiao, S. Gappy, J. Grove, D. Johnson, M. Johnson, C. Jones,

E. Jones, T. Kelly, N. Kerin, B. Letzring, M. Oleszkowicz, A. Raffee, K. Rasikas, C. Shaw, M. Siddique, B. VanOver, M. Zervos; Minnesota: D. Berman, V. Canzanello, J. Curtis, V. Erickson, W. Goodall, J. Graves, K. Guthrie, J. Haight, S. Hassing, J. Heegard, J. Holtzman, D. Jespersen, L. Klein, C. Kubajak, L. Nylund, P. Spilseth; Missouri: B. Appleton, R. Baird, S. Carmody, C. Carter, F. Charles, T. Finnigan, S. Giddings, K. Gorman, M. Gregory, L. Johnson, S. Joseph, L. Kennington, R. Kevorkian, J. LaSalle, B. Nolfo, J. Nunnelee, A. Orf, D. Palmer, H. Perry, A. Quick, B. Rogers, B. Rosemergey, C. Scott, S. Sharma, V. Shortino, D. Smith, K. Smith, C. Stanford, C. Tudor, T. Wiegmann; Mississippi: C. Adair, S. Armstrong, C. Brown, N. Brown, R. Brown, S. Burke, L. Burrell, L. Clark, S. Cooks, W. Crowell, D. Ellis, D. Graham, V. Green, R. Hall, S. Hamler, D. Haymon, A. Hinton, M. Holman, A. James, P. Karim, K. Kirchner, A. Knotts, A. Lott, W. McArthur, F. McCune, B. Miller, H. Morrow, R. Murphy, R. Myers, S. Myers, A. Phillips, M. Puckett, E. Rankin, O. Ransome-Kuti, M. Reddix, R. Rigsby, E. Searcy, D. Smith, A. Spann, Y. Tanner, E. Taylor-McCune, J. Tramuta, H. Wheeler, M. Wofford; Montana: L. Bigwood-Pecarina, S. English, H. Knapp, L. Sokoloski; Nebraska: M. Berry, E. Butkus, S. Byers, D. Colan, R. Dobesh, N. Hilleman, R. Hranac, P. Klein, T. McKnight, S. Mohiuddin, A. Mooss, R. Moyer, P. Myers, L. Rasmussen, J. Schafersman; Nevada: J. Chinn, R. Collins, E. Samols; New Jersey: S. Akgun, A. Bastian, L. Bordone, N. Cosgrove, A. Costa, A. Cuyjet, S. Daniels, L. DeEugenio, L. DeEugenio, R. Denniston, L. Duh, M. Farber, M. Farber, S. Ferguson, K. Ferranti, G. Flanagan, J. Garofalo, H. Hassman, J. Hassman, H. Jacobs, J. Kostis, A. Kudryk, M. Kutza, R. Liang, G. McArthur, B. McGann, R. Miller, E. Moser, F. Nash, P. Niblack, E. Ogunmefun, M. Raghuvanshi, S. Sastrasinh, T. Seely, J. Stanley, S. Suarez, A. Vaughn, R. Wong-Liang, J. Young, S. Yuchnovitz, M. Zolnowski; New Mexico: D. Graves, M. Groves, E. Iwan, J. Shipley; New York: N. Almelda, S. Anderson, J. Andres, N. Ankomah, E. Anteola, C. Assadi, M. Assadi, S. Atlas, J. Baruth, D. Barz, J. Begley, T. Bharathan, A. Bova, D. Brautigam, C. Brown, S. Canaan, M. Candelas, P. Caraballo, J. Chapman, L. Clark, K. Desai, D. Dowie, C. Dwyer, A. Farag, C. Flanders, P. Foster, L. Gage, A. Gartung, S. Gedan, P. Gehring, J. Gorkin, D. Graber, H. Guber, P. Gugliuzza, J. Halbach, A. Henriquez, M. Henriquez, D. Hoffman, J. Holland, C. Hopkins, C. Hull, E. Ilamathi, K. Johnston, M. Karim, L. Katz, K. Kellick, S. Kerlen, M. Krishnamurthy, D. Lainoff, R. Levin, V. Littauer, J. Lohr, M. Lorenz, C. Lynott, J. Maddi, L. Marquart, K. Martin, M. Maw, R. Mendelson, S. Monrad, A. Mustapha, A. Nafziger, M. Neary, J. Ngheim, A. Niarchos, M. Noor, M. Omoh, J. Pickard, M. Pier, V. Pogue, C. Reddy, J. Ringstad, T. Rocco, C. Rosendorff, H. Sandefur, A. Sass, R. Schifeling, D. Scott, P. Scriber, K. Sharma, C. Shmukler, D. Shrivastava, M. Siegelheim, G. Smith, B. Snyder, C. Spiller, M. Srivastava, S. Stevenson, A. Stewart, B. Sumner, M. Sweeney, K. Thomas, L. Thomas, L. Trawlick, N. Velez, J. Vento, H. Viswaswariah, M. Yevdayeva, D. Zimmerman; North Carolina: T. Barringer, V. Bland, M. Burke-Ziglar, K. Caldwell, R. Caldwell, F. Celestino, G. Cole, M. Darrow, B. Dunn, S. Fox, J. Holbrook, K. Jacobs, J. Lisane, L. Loggans, A. Lowdermilk, R. Merrill, P. Miller, C. Perkins, L. Rodebaugh, V. Schlau, R. Smith, J. Spruill, J. Summerson; North Dakota: N. Chelliah, E. Garten, K. Hagen, S. Jafri, D. Vold, B. Westacott; Ohio: L. Barnes-Lark, C. Blanck, K. Casterline, D. Chen, K. Cowens, M. Cubick, D. Davidson, P. Dockery, J. Finocchio, T. Gundrum, T. Hentenaar, D. Hulisz, D. Hull, K. Keaton, G. Kikano, K. Klyn, L. Lazon, D. Lukie, S. Medwid, L. Miller, R. Murden, H. Neff, E. Ospelt, M. Patel, E. Pelecanos, E. Pfister, L.

Sadler, M. Saklayen, A. Salomon, A. Schmidt, S. Stein, D. Subich, D. Thiel, L. Thompson, R. Toltzis, J. Tucker, D. Vidt, G. Wise, D. Wray; Oklahoma: D. Abott, J. Cook-Greenwood, M. Jelley, R. Kipperman, J. Leverett, C. Manion, S. Mears, B. Parker, R. Ringrose, L. Scholl, J. Schoshke, F. Shelton, M. Stephens, U. Thadani, K. Walters; Oregon: M. Dissanayake, S. Falley, H. Harris, S. MacKenzie, F. McBarron, S. Murray; Pennsylvania: G. Abbott, C. Baessler, M. Benioff, A. Bowens, J. Burke, L. Carradine, K. Devine, M. Duzy, G. Dy, J. Fontaine, D. Fox, W. Gilhool, J. Grasso, T. Ham, S. Heaney, J. Hefner, D. Herr, L. Hollywood, L. Jones, M. Kauffman, E. Kemler, S. Koduri, N. Kopyt, S. Kutalek, M. MacIntyre, R. Martsof, A. McLeod, A. Miller, A. Minnock, Y. Mishriki, D. Nace, L. Nagy, R. Olatin, C. Oschwald, N. Potts, R. Reinhard, R. Reinhard, N. Roberts, B. Rogers, D. Sant Ram, F. Sessoms, M. Shore, S. Shore, D. Singley, J. Spencer, D. Spigner, B. Springer, W. Swagler, P. Tanzer, S. Walker, N. Walls, D. Whyte, S. Worley, G. Ziady; Puerto Rico: A. Agosto, J. Aguilera-Montalvo, H. Algarin-Sanchez, J. Alvarado, I. Andino, J. Aponte Pagan, M. Arce, J. Benabe, J. Cangiano, L. Catoni, J. Cianchini, J. Claudio, M. Collazo, P. Colon, Y. Cruz-Lugo, J. DaMore, E. Edwards Volquez, A. Feliberti-Irizarri, P. Felix-Ramos, J. Fernandez-Quintero, M. Geo, M. Gomez, R. Gomez Adrover, L. Gonzalez-Bermudez, M. Guerrero, E. Guzman, J. Heredia, C. Irizarry, A. Leon, T. Lugardo, G. Martinez, R. Martinez, M. Melendez, M. Natal, M. Padilla, W. Pagan, Z. Perez, J. Pimentel, M. Pimentel Lebron, A. Ramos, M. Rios, C. Rivera, E. Rivera, J. Rivera Santiago, E. Rodriguez, D. Romero, R. Ruiz, C. Sanchez, J. Sanchez, M. Sosa-Padilla, I. Sotomayor-Gonzalez, J. Tavarez, I. Toro Grajales, B. Torres, N. Vazquez, S. Vazquez, M. Vega, Z. Vidal Oviedo, V. Zapata, I. Zayas-Toro; Rhode Island: C. Alteri, J. Galli, A. Hordes, L. Laflamme, K. MacLean, L. Marquis, R. Ruggieri, S. Sharma; South Carolina: J. Basile, L. Clarke, I. Coley, D. Devlin, S. Eggleston, G. Goforth, D. Ham, A. Hampton, P. Hill, K. Jones, R. Jones, P. Jumper, A. Kitchens, C. Lieberman, J. McAlpine, J. Moloo, A. Saenz, D. Sheek, A. Smith-Salley, P. Snape, J. Sterrett, C. Stone, M. Strossner, C. Sullivan, T. Vear, D. Weathers, M. Weeks, J. Williams, M. Williams; South Dakota: C. Ageton, M. Brown, L. Dale, L. Duncan, S. Eckrich, P. Kearns, B. Lankhorst, K. McDougall, V. Schuster, J. Wegenke, J. Woehl, E. Zawada; Tennessee: D. Anderson, C. Bounds, J. Caldwell, W. Cannon, R. Cassidy, W. Cushman, C. DeJesus, L. Dilworth, S. Duffy, B. Hamilton, T. Harrell, K. Harris, M. Herr, J. Jones, L. Jones, H. Marker, J. Miller, S. Miller, F. Putman, A. Reaves, V. Rhule, H. Ross-Clunis, S. Satterfield, G. Siami, R. Smith, A. Smuckler, C. Snorton, T. Stern, D. Venugopal; Texas: A. Abbas, H. Adroque, A. Amador, L. Arango, C. Arroyo, V. Battles, M. Beard, J. Beasley, R. Bhalla, G. Chauca, P. Damico, S. Davison, P. Dlabal, N. Duronio, C. East, F. Eelani, C. Farmerie, E. Fowler, O. Gambini, E. Griego, G. Habib, S. Hanna, D. Harden, T. Harrington, C. Herrera, T. Hicks, B. Hiltcher, D. Hyman, I. Lalani, A. Levine, S. Lu, I. Martinez, Y. Martinez, N. Mata, R. Motaparthi, B. Norch, M. Ottosen, V. Pavlik, L. Pearce, J. Periman, M. Pickard, N. Pokala, A. Ray, D. Richard, K. Rogers, M. Ruggles, L. Seals, D. Shafer, T. Shamsi, D. Sherwood-Berner, E. Soltero, A. Sy, J. Tomlinson, C. Vallbona, D. Verrett, R. Victor, W. Vongpatanasin, R. Young; Utah: R. Callihan, G. Henderson, J. O'Donnell, C. Slot, J. Swauger, C. Westenfelder, C. Williams; Vermont: B. Armstrong, B. Buckley, P. Courchesne, P. Cushman, F. Gallant, T. Howard, J. Osborne, R. Primeau, T. Tanner; Virgin Islands: K. Bryan-Christian, C. Christian, M. Morris; Virginia: D. Bryan, D. Connito, K. Damico, L. Gendron, E. Goudreau, M. Juarez, R. Lemly, L. Macklin, K.

McCall, J. Moore, D. Panebianco, D. Paulson, A. Pemberton, R. Renzi, D. Rice, J. Schmitt, S. Speese, J. Sperling, L. Thompson, G. Vetrovec, A. Williams, D. Williams, B. Zambrana; Washington: J. Anderson, K. Capoccia, G. Deger, A. Ellsworth, A. Micketti, W. Neighbor, S. Yarnall; West Virginia: H. Blackwood, S. Grubb; Wisconsin: P. Ackell, A. Arnold, S. Blumenthal, P. Bodmer, R. Dart, D. David, D. Duffy, L. Egbujiobi, M. Faignant, A. Friedman, B. Friedman, C. Koepl, M. Lintereur, J. Morledge, D. Neu, M. Noble, M. Rassier, G. Shove, M. Stevens, R. Wergin, L. Wollet, B. Yug, C. Zyniecki; Investigators and Coordinators, Canada: New Brunswick: C. Baer, J. LeBlanc, R. Withers, J. Yang; Newfoundland: J. Collingwood, P. Crocker, F. Jardine, S. Newman, G. Rideout, B. Sussex; Ontario: J. Baker, D. Bishop, C. Brose, D. Carswell, L. Charles, D. Coates, E. Coletta, M. Courtland, S. Crocker, R. Dhaliwal, T. Doey, D. Guy, D. Harterre, G. Harterre, C. Henry, D. Henry, D. Hutton, I. Janzen, H. Kafka, W. Kendrick, N. Kumar, R. Lan, F. Leenen, R. Lovell, B. McAuley, B. Melbourne, S. Melbourne, H. Morwood, S. Munro, S. Nawaz, T. O'Callahan, S. Prasad, P. Richardson, R. Rose, C. Sanderson-Guy, N. Schmidt, D. Spink, P. Spink, A. Stajfer, R. Tee, K. Usher, M. Wahby, R. Wahby, D. Wattam, L. Wells, M. Wiebe, K. Zarnke, P. Zuliani; Prince Edward Island: D. Cameron. Investigators and Coordinators Participating in the Antihypertensive Trial Only, United States: California: P. Bailey-Walton, N. Bednarski, M. Chen, S. Fochler, S. Gross, T. Harper, G. Hilliard, B. Holmes, E. Jacobson, P. Kirkland, N. Lopor, K. Moorehead, E. Portnoy, S. Rieux, N. Rodriguez, D. Schneidman, F. Yuen; Delaware: J. Holleger, T. Tonwe; Florida: U. Anderson, B. Austin, L. Bianco, F. Griffith, J. Jaffe, E. Killeavy, A. Kwon, C. Lewis, M. Manoucheri, L. Nitzberg, G. Ramos, P. Seabrooks, K. Sheikh, H. St John, T. St John, F. Zafar; Georgia: P. Douglass, R. Rhoades, R. Williams, A. Woodburn; Illinois: A. Chavarria, L. Chavarria, M. Davidson, S. Ifft, J. Mathien, B. Smith, D. Steinmuller, M. Steinmuller; Indiana: A. Artis, J. Carter, M. Hutchinson, D. Smith; Kansas: P. Bowen, J. Chambers, J. Fullard, L. Terry, S. Waldren; Louisiana: P. Daigle, J. Diggs, P. Lakshmiprasad, A. Leitz, B. Richardson; Maryland: E. Brightwell, J. Chandler, G. Denton, M. Kelemen, D. Tesch; Massachusetts: M. Cassidy, T. Sbarra; Michigan: R. Gudipati, C. Janners, S. Janners, M. Keshishian, W. Packard, B. Sheridan; Minnesota: L. Loes, K. Margolis; Missouri: S. Brennac, C. Crosdale, K. Gage, T. McKeel, T. McKeel; New Hampshire: J. Aliseo, M. Jacobs; New York: C. Anderson, S. Athanail, D. Castaldo, R. Castaldo, D. Clark, D. Copley, B. Dobrzynski, D. Dobrzynski, R. Farron, B. Hoffman, J. McLaughlin, K. Ong, T. Peoples, M. Price, I. Salom, S. Sears, R. Sutton, A. Zugibe, F. Zugibe; Ohio: L. Ballone, G. Barnett, D. Bradford, W. Feeman, C. Griffin, S. Moore, A. Narraway, G. Novak, G. Schroeder, J. Wiggins; Oklahoma: V. Christy, Y. Ong; Pennsylvania: A. Friedman, C. Matelan, M. Reyes, F. Sessoms, S. Silver, D. Watson; Puerto Rico: C. LaSalle-Ruiz; Tennessee: L. Hays, M. Houston; Texas: L. Alexander, D. Corral, B. Montgomery, J. Pappas, R. Rocha; Virgin Islands: D. Galiber, S. Healy; Investigators and Coordinators, Canada: Nova Scotia: T. Machel, J. Morash; Ontario: J. Cha, D. Dejewski, D. Jones, L. Jones, B. Lubelsky, R. Luton, A. Maczko, J. Otis.

## Supplemental Table 1. ALLHAT Comorbidity Definitions

| <b>Comorbidity</b>     | <b>Definition</b>                                                                                                                                                                        |
|------------------------|------------------------------------------------------------------------------------------------------------------------------------------------------------------------------------------|
| Coronary Heart Disease | History of myocardial infarction, angina, primary cardiac arrest, coronary stenosis > 50%, reversible perfusion defect on stress testing, or prior coronary revascularization procedure. |
| Diabetes               | Fasting plasma glucose > 140 mg/dl, a non-fasting glucose > 200 mg/dl, or treatment with insulin or oral hypoglycemic agent during the two years prior to study enrollment               |
| Smoking Status         |                                                                                                                                                                                          |
| Current Smoker         | Any cigarette use within 30 days of enrollment                                                                                                                                           |
| Non Smoker             | No cigarette use within 30 days of enrollment                                                                                                                                            |

ALLHAT, Antihypertensive and Lipid-Lowering Treatment to Prevent Heart Attack Trial;

dl, deciliter; mg, milligram.

**Supplemental Table 2.** Baseline Characteristics of ALLHAT Participants With and Without a Baseline Study Electrocardiogram (ECG)

| Characteristic                                 | Without ECG <sup>‡</sup><br>(n = 774) | With ECG<br>(n = 14,837) | P value <sup>†</sup> |
|------------------------------------------------|---------------------------------------|--------------------------|----------------------|
| Age, years, mean (SD)                          | 70.5 (6.7)                            | 71.4 (6.6)               | <0.001               |
| Female Gender, n (%)                           | 468 (60)                              | 8,367 (56)               | 0.03                 |
| Race, n (%)                                    |                                       |                          | <0.001               |
| White Non-Hispanic                             | 229 (30)                              | 7,050 (48)               |                      |
| Black                                          | 388 (50)                              | 5,043 (34)               |                      |
| Hispanic                                       | 151 (20)                              | 2,532 (17)               |                      |
| Other                                          | 6 (1)                                 | 212 (1)                  |                      |
| Body Mass Index, kg/m <sup>2</sup> , mean (SD) | 29.6 (6.6)                            | 29.2 (6.0)               | 0.03                 |
| Current Smoker, n (%)                          | 159 (21)                              | 2,466 (17)               | 0.004                |
| Coronary Heart Disease, n (%)                  | 160 (21)                              | 4,049 (27)               | <0.001               |
| Diabetes, n (%)                                | 339 (51)                              | 5,817 (42)               | <0.001               |
| GFR, ml/min/1.73 m <sup>2</sup> , mean (SD)    | 76.5 (22.2)                           | 73.9 (19.4)              | 0.001                |
| Serum potassium, mEq/L, mean (SD)              | 4.3 (0.5)                             | 4.3 (0.5)                | 0.60                 |
| Cholesterol, mg/dL, mean (SD)                  |                                       |                          |                      |
| Total                                          | 220 (45)                              | 217 (44)                 | 0.12                 |
| HDL                                            | 49 (14)                               | 48 (15)                  | 0.52                 |
| LDL                                            | 139 (40)                              | 136 (37)                 | 0.08                 |
| Antihypertensive Treatment Group               |                                       |                          | 0.40                 |
| Chlorthalidone                                 | 337 (43)                              | 6,818 (46)               |                      |
| Amlodipine                                     | 224 (29)                              | 4,040 (27)               |                      |
| Lisinopril                                     | 213 (28)                              | 3,979 (27)               |                      |

\*Participants without a baseline ECG were excluded from the overall analysis. †P values are for the comparison of the indicated characteristic in participants with versus without a baseline ECG. AF, atrial fibrillation; AFL, atrial flutter; GFR, glomerular filtration rate; HDL, high density lipoprotein; LDL, low density lipoprotein; SD, standard deviation.



**Supplemental Table 3.** Antihypertensive Treatment Sensitivity Analyses

| <b>Analysis</b>                    | <b>Study Drug<sup>§</sup></b> | <b>Hazard Ratio</b> | <b>95% CI</b> | <b>P value</b> |
|------------------------------------|-------------------------------|---------------------|---------------|----------------|
| <b>AF Only<sup>*</sup></b>         | Lisinopril                    | 1.04                | 0.94 to 1.15  | 0.48           |
|                                    | Amlodipine                    | 0.92                | 0.83 to 1.03  | 0.133          |
| <b>In-trial AF/AFL<sup>†</sup></b> | Lisinopril                    | 1.08                | 0.94 to 1.24  | 0.29           |
|                                    | Amlodipine                    | 0.91                | 0.78 to 1.05  | 0.21           |
| <b>Fine-Gray<sup>‡</sup></b>       | Lisinopril                    | 1.05                | 0.96 to 1.16  | 0.27           |
|                                    | Amlodipine                    | 0.94                | 0.85 to 1.03  | 0.20           |

\*Outcome restricted to incident AF; AFL was omitted from the outcome definition.

†Outcome restricted to incident AF and AFL diagnosed by either ECG or CMS coding during active trial follow-up.

‡Death treated as a competing risk using a Fine-Gray model.

§Compared to chlorthalidone.

AF, atrial fibrillation; AFL, atrial flutter; CI, confidence interval; CMS, Centers for Medicare Services; ECG, electrocardiogram.

**Supplemental Figure 1. Cumulative Incident AF/AFL Rate By Treatment**

Randomization

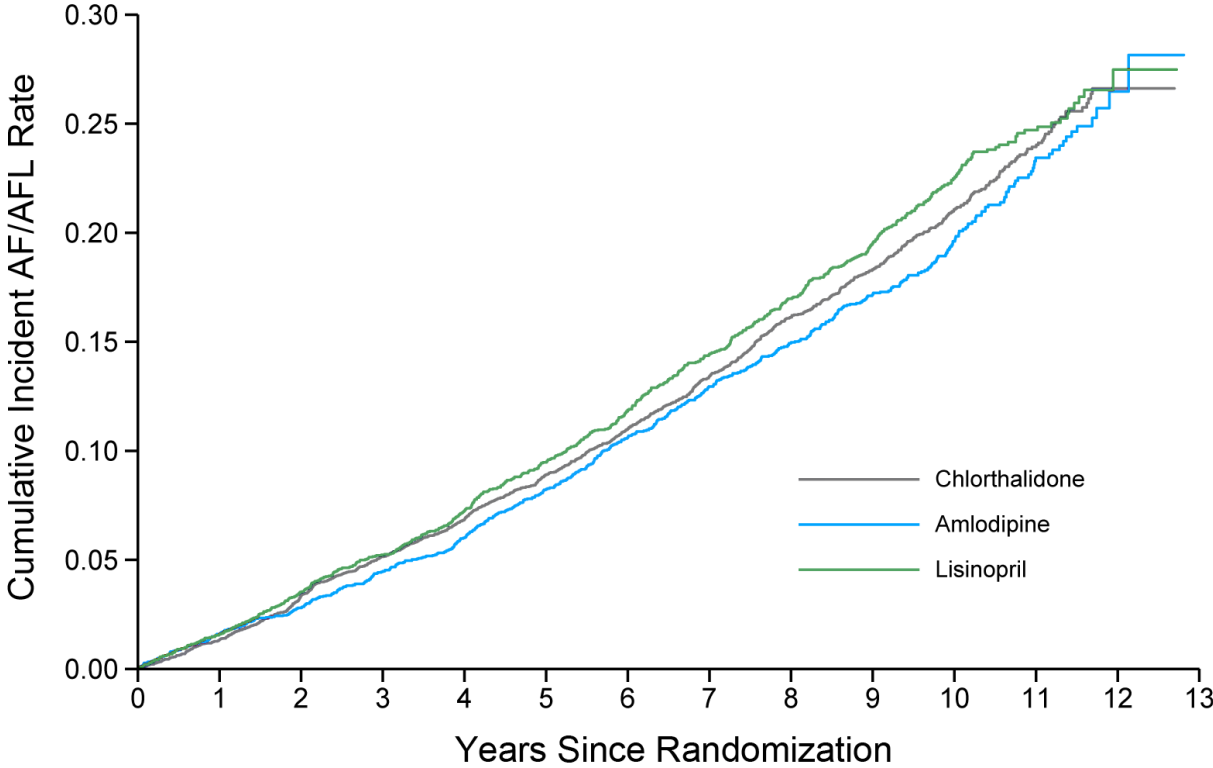

Supplement: NIHMS918120-supplement-005463_-_Supplemental_material.pdf [file NIHMS918120-supplement-005463_-_Supplemental_material.pdf]
