# Supplementary material
Source: PubMed Central journal article supplement (PMC5728652)

# Treatment with Lisinopril is Not Associated with Reduced Incident Atrial Fibrillation (AF) Risk

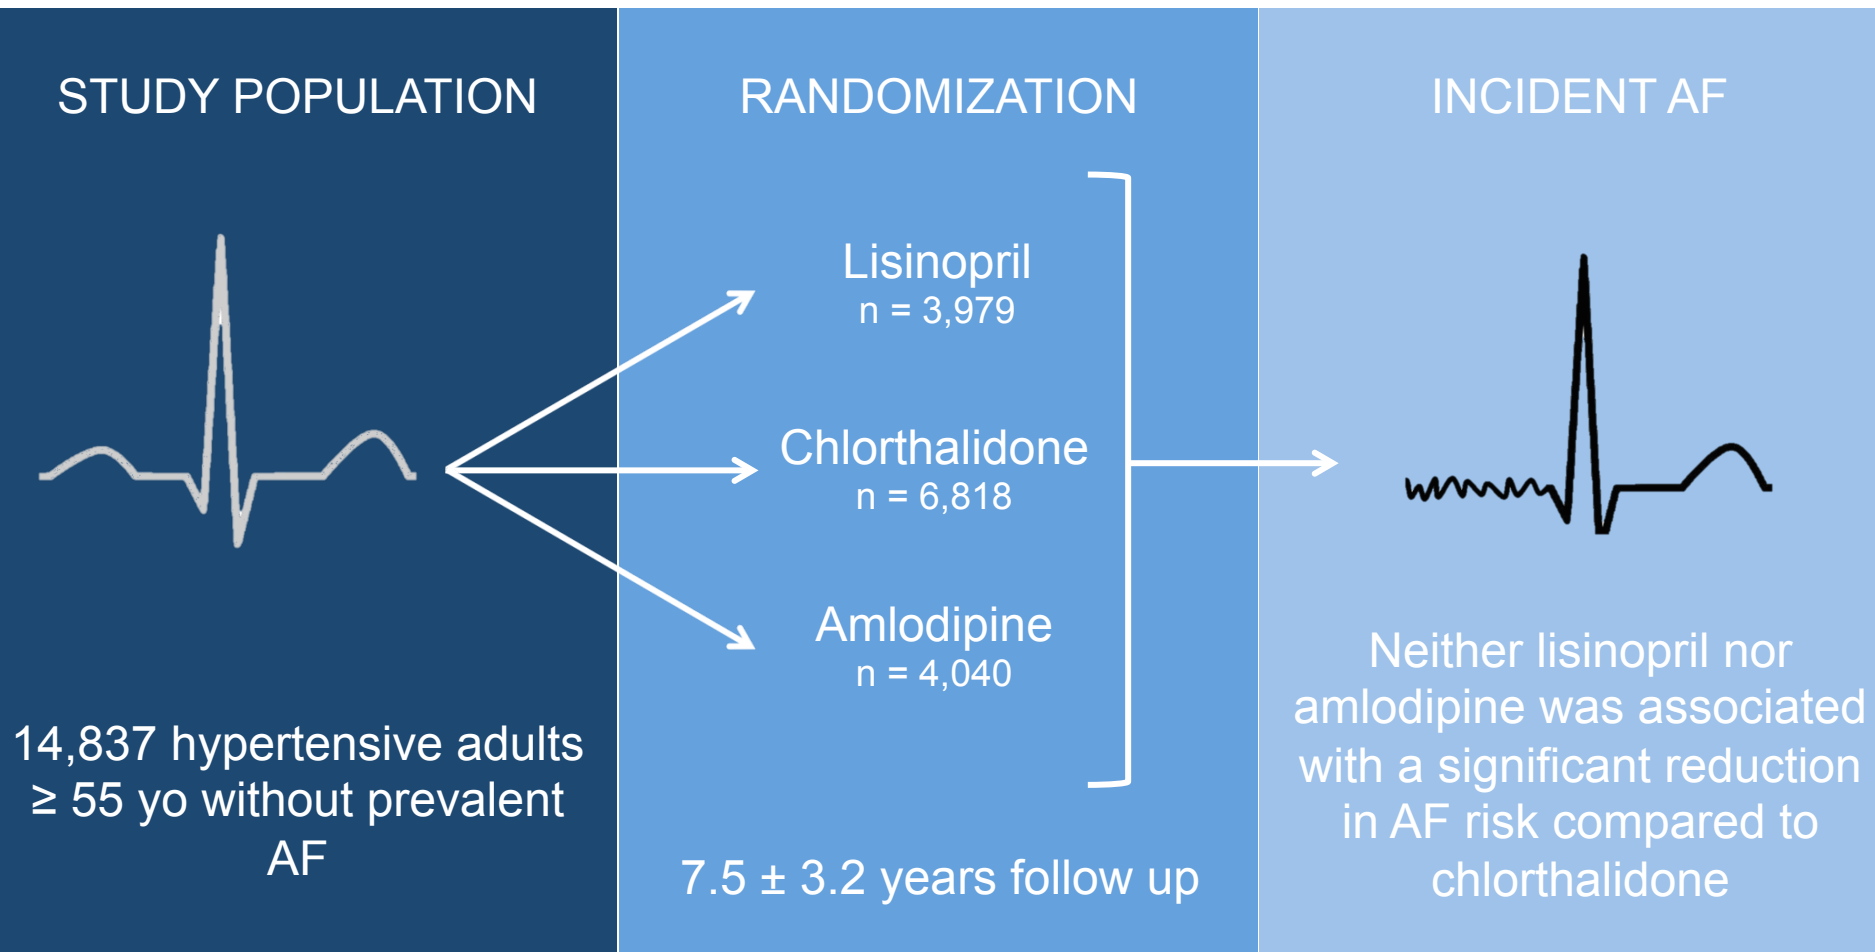

Supplement: NIHMS918120-supplement-005463_graphic_abstract.pdf [file NIHMS918120-supplement-005463_graphic_abstract.pdf]
